# Supplementary material for: Active Estrogen Receptor-alpha Signaling in Ovarian Cancer Models and Clinical Specimens
Source: Oxford University Press journal article supplement (doi:10.1158/1078-0432.ccr-16-1501), 2017-01-10
Supplement: 10780432ccr161501-sup-166984_1_supp_3758585_th82jb.xlsx [file 10780432ccr161501-sup-166984_1_supp_3758585_th82jb.xlsx]

## Sheet: CA-125
pre-endo CA-125	post-endo CA-125	post>pre?
60	511	y
510	1252	y
38.4	99.8	y
40.6	33	n
571.1	716.1	y
85.2	390.9	y
88.9	206.9	y
185.7	941.5	y
47.2	1509	y
2666.1	7322.9	y
215.5	7560	y
42.5	42.5	n
48	2454	y
579	1595	y
956.1	325.1	n
14.7	53.2	y
1521	20803	y
20	62	y
961.2	1157.7	y
131	41	n
10	40	y
55	166	y
99	309	y
415	1052	y
12	15	y
11.3	26.2	y
15	85	y
32	109	y
7.9	15	y
58	505	y
25	45	y
42	73	y
529	707	y
226	250	y
27	136	y
225	2823	y
97	641	y
36	146	y
30	50	y
236	542	y
9	27	y
380	2540	y
12.7	77	y
14	9	n
116	222	y
9	78	y
