# Supplementary material for: Active Estrogen Receptor-alpha Signaling in Ovarian Cancer Models and Clinical Specimens
Source: Oxford University Press journal article supplement (doi:10.1158/1078-0432.ccr-16-1501), 2017-01-10
Supplement: 10780432ccr161501-sup-166984_1_supp_3758586_th7xrn.xlsx [file 10780432ccr161501-sup-166984_1_supp_3758586_th7xrn.xlsx]

## Sheet: PEO4 log2FC
	PEO4
Symbol	E2 vs Veh _FC	4OHT+E2 vs Veh _FC	4OHT vs Veh _FC	ICI+E2 vs Veh _FC	ICI vs Veh _FC
ZNF667	0.355234	-0.076923	0.0238511	0.0938885	0.0871915
TSPAN15	0.660566	-0.0764	0.0697775	0.141338	0.168231
RAB7L1	0.306899	-0.405206	-0.259955	-0.195796	-0.231338
PPP1R3D	0.268856	-0.0253253	0.00371794	0.0668073	0.0215575
MINA	0.336054	-0.132032	-0.0415701	0.0361691	-0.0714218
PELI1	0.374754	-0.0762752	0.0808605	0.0579965	0.0361659
MYBL1	0.599689	0.159223	0.340657	0.285796	0.249596
BRIX1	0.297156	0.147308	0.15901	0.15552	0.12298
SLC7A2	0.478879	-0.00504006	0.0232708	0.0357128	-0.146561
PPAT	0.350483	0.0451046	0.0737805	0.101006	-0.0208109
FASTKD3	0.304267	0.0868815	0.0796174	0.125194	0.0581875
SCNN1B	0.254428	0.156535	0.161866	0.186496	0.143146
QTRTD1	0.273921	0.0541737	0.0336641	0.12913	-0.0108361
ID4	0.232487	0.0623675	0.107794	0.121358	0.0556424
WDR3	0.413082	0.130716	0.169324	0.113099	0.153985
TGIF2	0.502799	0.141101	0.105094	0.0679152	0.124837
PRR5	0.324871	0.0053972	-0.0272253	-0.0359112	0.00567183
CACNA1I	0.95474	0.253592	0.267272	0.125323	0.326779
LIMS1	0.248488	0.148666	0.164148	0.124733	0.143583
RBBP8	0.617496	0.193937	0.265673	0.151771	0.103825
IL15	0.327298	0.0757927	0.149181	0.101817	0.053982
TLL2	0.606259	0.0587175	-0.128346	-0.0606597	-0.226467
SOX17	0.302935	0.0429168	-0.0318456	-0.0468174	-0.0923007
ITSN2	0.296797	0.080013	0.0106631	0.00771854	-0.0304875
KAZN	0.529948	0.106375	-0.0214021	-0.0160374	-0.0546936
AKAP1	0.347051	0.126801	0.0183445	0.0619753	-0.0163075
TIMM8A	0.197001	0.104795	0.0768513	0.0556973	0.0479092
IL12A	1.02103	0.353535	0.133776	-0.0120725	-0.11014
RASGRP1	1.9351	1.01549	0.908616	0.54332	0.524659
SHB	0.421186	0.259406	0.174596	0.113919	0.11587
PVR	0.329725	0.20888	0.131309	0.102585	0.0691455
PEX5	0.262288	0.165349	0.103482	0.0788013	0.0653333
OSBPL3	0.738299	0.306871	-0.0118794	-0.00260953	-0.00394448
STC2	0.458991	0.185985	0.0682958	-0.0225106	0.0697362
E2F6	0.254295	0.101873	0.0506413	-0.0139906	0.0630822
SLC7A5	0.307071	0.182048	0.143806	0.0599679	0.14022
DHODH	0.286287	0.170547	0.144907	0.0744019	0.132738
SPRY1	0.318067	0.0283963	-0.0330394	-0.216047	-0.174481
PLEKHF1	0.333862	0.148927	0.139498	0.00968769	0.0373325
SIX1	0.804165	0.457553	0.406357	0.173683	0.288667
HES1	0.539834	0.315502	0.251583	0.091102	0.165699
PPRC1	0.375	0.202225	0.157383	0.0669673	0.111136
CD3EAP	0.482703	0.265491	0.199355	0.105835	0.16446
ARL4C	0.408496	0.232893	0.165587	0.0796034	0.114995
TSEN2	0.465131	0.00247941	-0.00688522	-0.0123821	-0.0914158
PLCL2	0.637498	0.0323468	0.0191304	0.0198993	-0.0630374
CEBPD	0.899393	0.143489	0.0952035	-0.0053157	-0.0370604
PLAT	0.554626	0.153948	0.165994	0.136331	0.150548
KAZN	1.34788	0.420655	0.360111	0.257754	0.309194
HES1	0.579353	0.132904	0.0951766	0.0276062	0.0626839
SLC22A5	0.66183	0.121674	-0.0269689	0.073865	0.0685484
PPYR1	0.27964	-0.095647	-0.148507	-0.0993162	-0.131143
PLCL2	0.966223	0.0779698	-0.0822779	-0.0547095	-0.129421
CA12	1.22624	0.238921	0.0827323	0.10975	0.0940398
ERG	0.667878	0.0641647	-0.000282165	0.0386258	-0.0141877
SYBU	0.337791	0.165484	0.127948	0.125026	0.137144
LOC100505650	0.834224	0.200185	-0.0474893	0.00316754	0.107335
FLG	0.594936	0.0154062	-0.248556	-0.144836	-0.0576286
FAM134B	0.274567	0.00773051	-0.103598	-0.0536461	-0.012655
TMPRSS3	0.503365	-0.0417631	-0.111926	0.00361501	0.0973903
RPS6KA2	0.580772	-0.084738	-0.203597	-0.0452337	0.0872636
PIPOX	0.50892	-0.0588063	-0.147433	-0.0882364	0.0856256
MLPH	0.305691	-0.0696111	-0.12257	-0.0923704	0.0333991
BICD1	0.286128	0.0509971	-0.0353315	0.041347	0.0787377
DEPTOR	1.19349	-0.130483	-0.10444	0.0664133	0.0693347
GREB1	1.69956	-0.130659	-0.0877607	0.211979	0.0213477
OLFML3	1.11648	-0.0534306	-0.0886006	-0.0533569	0.109394
GFRA2	1.07562	0.175436	0.194447	0.212937	0.246198
PKNOX2	1.25805	0.158182	-0.0135672	0.270667	0.376286
F13A1	0.287025	-0.214859	-0.26649	-0.157732	-0.126104
CASQ2	0.50712	-0.449258	-0.553285	-0.275439	-0.209873
BMP7	0.590089	-0.164213	-0.203027	-0.086167	-0.039562
TPST2	0.343105	0.00916536	0.0461938	0.0141835	0.129275
ST6GALNAC2	0.436435	0.0252092	0.0105604	-0.0470923	0.118273
RAB17	0.307641	0.0438765	0.0487913	0.0164582	0.11463
CRYBG3	0.388259	0.0762669	0.0592811	0.0478693	0.163651
SRSF7	0.326667	0.126041	0.114624	0.0740183	0.163707
TBC1D16	0.42919	0.0488761	-0.0405765	-0.0419875	0.102825
ABCC1	0.303742	0.102005	0.0517873	0.0394102	0.114149
PRR5	0.371714	0.0705132	-0.0348088	-0.0415381	0.131943
RCL1	0.276616	0.100081	-0.00333016	-0.0291658	0.0908169
RAP1GAP	0.412998	0.115825	-0.0124705	-0.064493	0.125684
MPPED2	0.59146	-0.13459	-0.362355	-0.16149	-0.135485
LRRC8B	0.353691	-0.129056	-0.226379	-0.120705	-0.107208
PDGFRL	0.348763	-0.0346406	-0.11359	0.0116414	-0.0146302
FRAT2	0.31735	0.00944765	-0.108976	0.0259171	-0.00489699
FAM216A	0.394157	0.12491	0.0355118	0.110083	0.0814742
METTL21B	0.31709	0.188789	0.0990656	0.178492	0.131107
ZMIZ1	0.3207	0.00473636	0.00767816	0.0691014	0.127703
TNS1	0.271098	0.00913751	0.00280884	0.05116	0.127459
CHD7	0.307103	0.202849	0.208966	0.228147	0.252033
ELF3	0.425472	-0.184241	-0.339845	-0.12181	0.0677836
VAX2	0.333876	-0.0903803	-0.0817363	-0.0151989	0.17628
PDZK1	0.256594	-0.284433	-0.301267	-0.0766837	0.00812766
OVOL2	0.316548	-0.334883	-0.297449	-0.089681	0.0627074
UGT2B28	0.41303	-0.0960669	-0.113562	0.0489835	0.0621112
RHOBTB1	0.333671	-0.169948	-0.1966	-0.0261949	-0.0374855
BCL11A	0.694775	-0.0553404	-0.0681012	0.221036	0.158397
ABCC4	0.213991	0.015139	-0.0173458	0.0714545	0.0762428
CEP68	0.255671	-0.143509	-0.125336	0.0489849	0.018965
TMEM177	0.211351	-0.0231191	0.037842	0.070003	0.135378
BNC2	0.238841	-0.355079	-0.298161	-0.0887284	0.124023
DAAM1	0.332744	-0.501185	-0.351722	0.0668747	0.0267375
ZNF573	0.274589	0.022138	-0.212763	-0.0114705	0.0998412
TMEM47	0.239307	0.0658973	-0.125748	0.0303849	0.0897774
SCAMP1	0.300411	0.118016	-0.112216	0.0416025	0.167869
SV2A	0.298682	0.00274	-0.164082	-0.0604516	0.0997156
THY1	0.2685	0.0693645	-0.00488569	0.0335633	0.223976
GEMIN4	0.204056	0.122193	0.0470994	0.0300272	0.201628
ZNF556	0.333213	0.240552	0.18607	-0.00507535	0.11332
HK2	0.273983	0.195912	0.13769	-0.0143574	0.119909
RGS16	0.520552	0.280531	0.327427	-0.0105554	0.147506
ZNF232	0.29977	0.253584	0.135622	0.130083	0.167296
DIEXF	0.297128	0.234132	0.028805	0.0328645	0.110087
JARID2	0.392079	0.334931	0.0168229	-0.00494385	0.101244
TSKU	0.349837	0.273402	0.162136	0.110088	0.165307
SCARB1	0.230838	0.16459	0.0219724	-0.0241573	0.0388681
LRP8	0.222767	0.186368	0.125963	0.103649	0.141651
C10orf2	0.457876	0.289361	0.0982279	-0.0441625	0.0543892
MID1IP1	0.290514	0.163257	0.0264963	-0.0411477	0.00642282
NXT1	0.305242	0.223655	0.0641533	-0.0283648	0.0142662
CHST10	0.31087	0.216634	0.0775071	0.0296734	0.047415
SIN3B	0.339415	0.127542	-0.104696	-0.167087	0.00912503
DPH2	0.240671	0.15542	0.0614752	0.0417504	0.0990542
TBC1D30	0.450548	0.205459	-0.159815	0.0117103	0.120311
DFFB	0.317459	0.161317	0.00076512	0.0608452	0.125841
KIAA1199	0.673684	0.252917	-0.0752351	0.00435301	0.107101
CADM1	0.299994	0.118919	-0.0335909	0.00733068	0.0657818
GPD1L	0.210042	0.079405	-0.0100181	-0.000822914	0.0631153
TACSTD2	0.285856	0.167431	-0.0135695	0.00137383	0.129709
RARA	0.317554	0.293272	0.167705	0.113925	0.288702
PADI2	0.29792	0.23515	0.102663	0.00415942	0.16667
YRDC	0.217946	0.315764	0.187888	0.0397417	-0.00358496
SLC19A2	0.419346	0.593848	0.412045	0.196156	0.133685
PDLIM4	0.474713	0.763149	0.40083	0.0824338	-0.0175319
PWP2	0.264591	0.338036	0.241638	0.0870372	0.11026
TNFRSF10B	0.360287	0.617127	0.404374	0.191361	0.261497
COBL	0.461689	0.823344	0.500684	0.141855	0.259486
PPP1R3C	0.338628	0.725545	0.553035	0.105498	0.129069
KLHL21	0.46472	0.808199	0.615192	0.287052	0.299914
BIRC3	0.402671	1.05816	0.585602	-0.103459	-0.181844
PPAP2B	0.424838	0.790039	0.317117	0.107287	0.115651
INHBB	0.362796	0.523798	0.223218	0.0797447	0.0838028
MAP3K9	0.326317	0.483473	0.248671	0.0982368	0.206399
CAMK2N1	0.281098	0.441704	0.15876	0.0715448	0.128696
TTC9	0.355933	0.395707	0.233472	0.0793105	0.126557
LHX6	0.375173	0.350127	0.249579	0.124765	0.184581
KIAA0226L	0.858579	0.844121	0.452478	0.0702743	0.130024
GRPEL1	0.328939	0.292112	0.168012	0.0178513	0.0274515
ABTB2	0.583479	0.526525	0.332751	0.136866	0.159983
THBD	0.809368	0.902931	0.605614	0.153797	-0.0442983
MAK16	0.249898	0.271352	0.193945	0.0785422	0.0557374
POP1	0.26184	0.266895	0.174913	0.0507363	0.0210818
MREG	0.373187	0.356967	0.265511	0.105064	0.0641661
BMP2	0.511373	0.605933	0.389793	0.163738	0.0837161
IL24	0.588947	0.659017	0.409369	0.194747	0.131461
INHBA	0.541133	0.526476	0.368571	0.0510506	0.108351
DUSP2	0.716592	0.703832	0.541698	0.0761857	0.0956324
SOWAHC	0.534514	0.574886	0.499572	0.187486	0.119806
BDNF	0.564807	0.525745	0.492905	0.152689	0.0379693
ANKRD1	0.366524	0.308918	0.20911	-0.0184335	-0.136621
MNT	0.409355	0.55269	0.395966	0.100593	0.279183
CAMSAP1	0.300812	0.430942	0.313217	0.0569638	0.151466
BDKRB1	0.541356	0.604511	0.446966	0.0981457	0.296621
CCDC86	0.277902	0.28217	0.225038	0.095604	0.211991
MAPKBP1	0.418642	0.403294	0.146877	-0.00255862	0.211001
IVL	0.613255	0.645617	0.428446	0.289838	0.472218
IFIT5	0.237721	0.256035	0.147199	0.045537	0.160656
FZD5	0.252647	0.254887	0.07766	0.00176192	0.077204
ZNF239	0.443602	0.2621	0.168812	0.0530399	0.00826875
KLF4	0.966469	0.509177	0.458373	0.12512	0.0701072
MYC	0.96763	0.537441	0.530564	0.0334059	-0.151163
FJX1	0.479229	0.33432	0.314132	0.156367	0.102033
TMEM30B	0.341515	0.205812	0.196286	0.128431	0.056683
TGFA	0.300977	0.15106	0.144718	0.099395	-0.0443485
RRS1	0.391297	0.188566	0.140221	0.104528	0.00423693
DIEXF	0.486453	0.312409	0.263047	0.234794	0.116298
PNPLA3	0.5198	0.260126	0.136702	0.103907	-0.0406648
GEMIN6	0.239716	0.0852901	-0.00180135	0.00216278	-0.0859024
EIF3M	0.432927	0.245096	0.118532	0.136532	0.0232994
PPAT	0.335441	0.153284	0.13096	0.106211	0.0419012
POLR1E	0.372974	0.113123	0.117621	0.02509	-0.0621311
UCK2	0.284244	0.227787	0.185624	0.105773	0.0771242
OTUB2	1.01199	0.794866	0.608875	0.222324	0.19902
NOP16	0.432093	0.382291	0.261581	0.104757	0.0667153
POLR1C	0.404802	0.288413	0.131626	0.0232655	-0.0723808
HRH1	0.515049	0.371552	0.226299	0.14009	0.0423963
B4GALT5	0.281324	0.212721	0.14166	0.0882207	0.0699797
SOX9	0.774798	0.764454	0.456494	0.26963	0.18829
PER2	0.3056	0.276581	0.134854	0.0351164	-0.0465873
TFAP2C	0.528833	0.394231	0.317805	0.114627	-0.224723
SLC30A1	0.285558	0.24055	0.207854	0.164215	0.124053
POLR3K	0.214518	0.165401	0.114729	0.0563647	-0.0075773
EHD1	0.301359	0.218072	0.127548	0.0489348	-0.0686662
NOP16	0.526404	0.350778	0.28727	0.212741	0.0643666
ZFP36L2	0.292411	0.09853	0.222882	0.0466634	-0.0697601
TFB2M	0.281607	0.102412	0.161949	0.0710855	-0.0409038
E2F5	0.235828	-0.0351313	0.0601296	-0.0106921	-0.377179
NIP7	0.373674	0.056835	0.127529	0.130105	-0.137363
MRPS30	0.190552	0.117031	0.0678085	0.0609241	-0.108355
LOC389906	0.364727	0.244072	0.162836	0.226034	0.0329835
TBC1D9	0.228946	0.207007	0.0910679	0.12695	0.0427645
MN1	0.377175	0.369482	0.0371806	0.0460794	0.0124128
POLR3G	0.372675	0.249279	0.0728477	0.11178	0.0741933
EDAR	0.487056	0.30482	0.114737	0.174108	0.136326
LYN	0.245849	0.174405	0.0254819	0.115497	0.0444295
FUT9	-0.226362	-0.263065	-0.38931	-0.331651	-0.361563
F3	0.454956	0.64528	0.643319	0.215228	0.0686448
BAZ1A	0.277379	0.348413	0.33469	0.229173	0.16397
DUSP7	0.32879	0.445869	0.383173	0.171123	0.108082
RALA	0.256473	0.393646	0.304695	0.242992	0.0883549
NDUFAF4	0.225635	0.222858	0.187175	0.12876	-0.042409
ZFP161	-0.215937	-0.273009	-0.248505	-0.124464	-0.425399
SCN2B	-0.3887	-0.321839	-0.300257	-0.232773	-0.411244
ITGB4	-0.241358	-0.15283	-0.200702	-0.0737897	-0.341774
DNAJB4	-0.51804	-0.704071	-0.34849	-0.33058	-0.790355
C19orf6	-0.388257	-0.399814	-0.23193	-0.197491	-0.486293
TOB1	-0.228744	-0.0645329	0.0240262	-0.00852322	-0.128221
PALLD	-0.278962	-0.0806127	0.0342816	0.0242144	-0.204656
PAX8	-0.354633	-0.10739	0.0937196	-0.0477225	-0.260708
KLF9	-0.419114	0.0483156	0.193653	0.0955396	-0.23695
ARF6	-0.319536	-0.214404	-0.0351429	-0.116372	-0.283362
RNFT1	-0.668196	-0.48673	-0.223798	-0.286543	-0.809903
PLAU	-0.405412	-0.102541	0.12371	-0.0613112	-0.518804
PHACTR2	-0.254573	-0.161137	0.0275801	0.0515286	-0.0768929
HOXB3	-0.247779	-0.194628	0.0408357	0.0812555	-0.16352
MLL	-0.322702	-0.279952	-0.112165	0.070875	-0.149392
CTGF	-0.486054	-0.521378	-0.315416	-0.273371	-0.36529
COL1A1	-0.269292	-0.279176	-0.264688	-0.00602534	-0.164168
HEXIM1	-0.25037	-0.308743	-0.250089	-0.0813075	-0.22154
LIMK2	-0.400807	-0.458466	-0.421831	-0.190466	-0.440102
IQGAP2	-0.321884	-0.327786	-0.343709	-0.286915	-0.314036
TSPAN2	-0.327828	-0.520742	-0.51134	-0.351354	-0.52871
TM4SF1	-0.408834	-0.0937063	-0.0478056	-0.301737	-0.472459
SERPINB2	-0.28854	0.0352387	0.0285143	-0.199682	-0.28796
DUSP1	-0.601737	-0.257868	-0.0764893	-0.384413	-0.624895
CITED2	-0.360171	0.117531	0.221964	-0.0675909	-0.366119
SLIT2	-0.243209	0.431348	0.136907	-0.0704475	-0.0589766
HNRNPU	-0.321441	-0.0572661	-0.185894	-0.226176	-0.205729
CADM4	-0.327716	-0.179348	-0.280004	-0.294011	-0.280872
DKK1	-0.582034	0.910927	0.537643	0.311542	0.154948
ARID5B	-0.586022	0.177488	-0.0187964	-0.221382	-0.13163
PCDH7	-0.276605	0.856584	0.699371	0.210895	0.217657
DUSP5	-0.352982	0.577485	0.475527	-0.0940563	-0.192471
AREG	-0.419914	1.3772	1.02161	0.0958036	-0.18597
SLC35G2	0.223606	0.620862	0.514612	0.211775	0.0865154
DNMBP	0.261158	0.890759	0.651308	0.150111	0.113807
RSRC2	-0.267704	-0.0661787	-0.146968	-0.0582373	-0.232352
PPFIBP1	-0.489372	0.0399329	-0.0839674	0.14005	-0.266533
FZD7	-0.331752	-0.0203211	-0.19306	-0.0544505	-0.244922
RNF19A	-0.427431	0.0373439	-0.0735853	0.0806199	-0.0568341
PDP1	-0.489604	0.134659	0.16421	0.0229698	-0.157489
EZR	-0.28297	0.275163	0.330637	0.269836	0.0743746
EFNB2	-0.411174	0.421298	0.31722	0.211617	0.271882
FAM49A	-0.324208	-0.0138016	-0.0530905	-0.0482328	-0.0750963
KLF5	-0.489988	0.135574	0.0365248	-0.0290162	-0.120051
PTGER4	-0.283932	0.0607197	-0.177201	-0.132019	-0.116811
CXCR4	-0.308447	0.0746937	-0.197349	-0.148689	-0.0420171
ZBED2	-0.354965	-0.100413	-0.0832189	-0.116202	-0.0401027
EPHB3	-0.377732	0.0133513	0.0811443	0.0021942	0.116599
NRG1	-0.367356	-0.036998	-0.0160689	-0.120161	-0.0484971
ADM	-0.285507	0.01665	0.0251686	-0.00955364	0.186736
TSC22D1	-0.255944	-0.131871	-0.161859	-0.0433604	-0.0472683
PCDH9	-0.464376	-0.27519	-0.328046	-0.0589457	0.00699766
GPR64	-0.33695	-0.258381	-0.220414	-0.105684	0.0368506
DNAJC6	-0.369578	-0.257793	-0.299506	-0.115272	0.020972
CCNG2	-0.306172	-0.250867	-0.259219	-0.0219756	0.102381
SYNC	-0.421871	-0.15688	-0.143779	-0.0455569	0.00254276
EPHA4	-0.501112	-0.110696	-0.101489	0.00553529	0.113051
FOXE1	-0.323362	-0.20228	-0.120081	-0.0619664	-0.0220328
NUSAP1	-0.320684	-0.163377	-0.105467	-0.00187368	-0.0529518
NCAPG	-0.248249	-0.154519	-0.0300265	0.0560287	-0.0160493
KITLG	-0.272512	-0.216498	-0.0841854	-0.0482694	-0.0704985
WNT6	-0.321749	-0.309519	-0.195448	-0.167664	0.0600491
TLR6	-0.332013	-0.353003	-0.292537	-0.245691	-0.145889
SLC2A3	-0.451415	-0.681039	-0.733225	-0.195044	-0.0878699
TMEM100	-0.328232	-0.745842	-0.777724	-0.00101351	0.0478926
FLVCR2	-0.280248	-0.453055	-0.511071	-0.151976	-0.119896
IGF1	-0.366265	-0.819299	-0.782	-0.296371	-0.205016
FGF18	-0.369063	-0.458478	-0.37887	-0.104674	0.0128313
BMP4	-0.275387	-0.401024	-0.342233	-0.13476	-0.00249978
C1orf106	-0.295219	-0.510365	-0.371596	-0.208771	-0.0713318
TXNIP	-0.397824	-0.633433	-0.482057	0.00707313	-0.0822709
MYCN	-0.520739	-0.984708	-0.660982	-0.157733	-0.0693711
CYP1B1	-0.426385	-0.707088	-0.521138	-0.168347	-0.119641
PDZRN4	-0.468889	-0.480672	-0.488502	-0.109604	-0.0939495
TRIM38	-0.240048	-0.223798	-0.172891	-0.0770887	-0.0208413
SEMA3A	-0.298169	-0.297975	-0.268105	-0.175236	-0.166274
C5orf54	-0.308851	-0.292833	-0.223449	-0.117822	-0.0959309
NCOA3	-0.252245	-0.275487	-0.195462	-0.107797	-0.096794
ADAMTS1	-0.405096	-0.443343	-0.244148	-0.0925427	-0.0930457
NDC80	-0.21841	-0.351255	-0.176167	-0.0183281	0.0183364
STYK1	-0.276389	-0.296806	-0.371848	-0.295704	-0.134446
NOX4	-0.327143	-0.398176	-0.432232	-0.294859	-0.135921
C1orf115	-0.250748	-0.328432	-0.36981	-0.143251	0.0850427
SERPINB13	0.266135	0.191937	0.241923	0.155233	0.240155
C22orf29	0.325203	0.241843	0.330011	0.230245	0.288706
OTOR	0.329542	0.274417	0.457867	0.234171	0.574681
	PEO1
Symbol	E2 vs Veh _FC	4OHT+E2 vs Veh _FC	4OHT vs Veh _FC	ICI+E2 vs Veh _FC	ICI vs Veh _FC
ZNF37BP	0.368433	-0.00902891	-0.0546281	0.0828955	0.0749029
AP3M2	0.215773	-0.111034	-0.151617	-0.0224673	-0.0300545
OVOL2	0.305243	-0.379759	-0.458297	-0.162522	-0.193445
GAL	0.272597	-0.00895726	-0.0565729	0.0692488	0.0414641
RHOBTB1	0.435764	-0.253377	-0.368511	0.00461516	-0.117869
SLC29A3	0.413983	-0.300815	-0.385604	-0.145519	-0.204065
SATB2	0.35434	-0.239696	-0.246002	-0.121017	-0.166407
RHOBTB3	0.570492	-0.0105567	-0.0297213	0.105515	0.0508401
PLCL2	0.392967	-0.128631	-0.130452	-0.0285042	-0.0770035
OLFML3	0.643052	-0.296216	-0.349085	-0.101975	-0.230069
INHBB	0.456971	-0.291155	-0.345164	-0.147419	-0.218103
SDPR	0.280629	-0.284186	-0.272888	-0.151728	-0.0829088
IRX5	0.393859	-0.269035	-0.270267	-0.147105	-0.108148
SLC22A4	0.454143	-0.148137	-0.122005	0.0688344	-0.0666505
INPP4B	0.278585	-0.0280767	-0.000700914	0.0788828	0.042
PTHLH	0.280928	0.0295174	0.0204223	0.113403	0.0836918
MECOM	0.493519	-0.117841	-0.145407	0.0778165	-0.0224422
HERC1	0.279374	-0.0884033	-0.0777821	0.0561116	-0.00985751
RHOBTB3	0.560728	-0.274694	-0.169715	0.147937	-0.0775045
POLR1E	0.242995	-0.0749346	-0.0807115	0.0682832	-0.0208328
AMPD3	0.212888	-0.0260628	-0.0405875	0.0621631	-0.0269942
TNPO2	0.298867	0.0913758	0.0169699	0.0589567	0.0771365
SMYD2	0.41785	0.0790156	-0.00880576	0.0650468	0.0459926
PDLIM4	0.245253	0.034419	-0.0287641	0.0170378	0.00147623
PDZK1	0.479732	-0.0515494	-0.134681	-0.0954001	-0.0838604
OTUB2	0.351931	-0.082794	-0.184881	-0.137257	-0.149242
PPP1R1A	0.345341	-0.0312055	-0.208617	-0.0815971	-0.132351
CACNA1I	0.365239	0.0590992	-0.158899	-0.0281341	-0.0688966
GLI3	0.262022	0.00139857	-0.126882	-0.00631827	-0.0175634
CUEDC1	0.331142	0.0936147	-0.0349469	0.0679304	0.0490311
MAFB	0.251367	0.0336613	-0.119009	-0.0352086	-0.00234569
RAB17	0.177112	-0.0623615	-0.171695	-0.0499164	-0.0348199
PORCN	0.244523	0.0690516	-0.0549918	0.0625108	0.062232
RIN3	0.17709	0.0746589	0.0115078	0.0937407	0.0298422
ASB13	0.269932	-0.0191138	-0.145948	0.036533	-0.112503
IVL	0.436984	0.205094	0.0865291	0.273147	0.152891
FJX1	0.225271	0.0353352	-0.0483254	0.0946207	-0.0199828
CYR61	0.265822	0.0303779	-0.0433823	0.0812629	-0.0102122
POLR1C	0.199618	0.0230186	-0.0297585	0.0501868	0.0103618
BNC2	0.446801	-0.130343	-0.333168	-0.0669396	-0.13929
ITPK1	0.249025	0.0132179	-0.0946922	0.0417155	-0.0188546
NCOR2	0.220945	0.0280411	-0.0315875	0.0772222	0.0332265
ZNF195	0.253076	0.0369575	0.068703	0.0797305	0.0817483
TSPAN5	0.320399	-0.0561077	-0.0336373	0.0273926	0.000338938
DEPTOR	0.808064	-0.332751	-0.311772	-0.124175	-0.159469
BCL11A	0.315429	-0.242305	-0.201143	-0.143155	-0.142528
ZMIZ1	0.606008	-0.0428278	-0.0561453	0.000894205	-0.00895276
MPPED2	0.509805	-0.204208	-0.195943	-0.149959	-0.121895
THY1	0.250613	0.00447801	0.011548	0.00947242	0.0270302
NPY1R	0.65395	-0.207121	-0.223758	-0.211943	-0.174296
NRTN	0.556941	-0.236976	-0.156505	-0.12777	-0.227163
ELF3	0.261261	-0.179711	-0.143632	-0.154545	-0.16352
FLG	0.434396	-0.549943	-0.388085	-0.211834	-0.368491
MICAL3	0.223953	-0.0801159	-0.0391871	0.0339751	-0.0419253
HIP1	0.445485	-0.0972011	-0.0135198	0.0403615	-0.0428052
TMEM120B	0.622914	-0.00176442	-0.0962989	0.00327135	-0.112686
SLC7A2	0.812661	-0.16711	-0.321731	-0.160444	-0.339691
RBBP8	0.493282	-0.277105	-0.373791	-0.266901	-0.375923
MPHOSPH10	0.228913	0.00313682	-0.00298449	0.0342668	-0.00317175
GREB1	1.96038	-0.685599	-0.842413	-0.33418	-0.776634
CADM1	1.00159	0.0444803	-0.034612	0.115167	-0.0310627
SLC9A3R1	0.241587	-0.0296552	-0.0704738	-0.0149518	-0.0454521
SLC22A5	0.672521	-0.161973	-0.285923	-0.101888	-0.199963
PAPSS2	0.760664	0.073825	-0.0302027	0.087716	0.034671
HIPK2	0.27142	0.0443292	-0.0215694	0.0374659	-0.0133663
TGFA	0.290462	-0.136429	-0.151922	-0.0428975	-0.158354
ARHGAP26	1.08448	0.0170243	0.0224088	0.217373	-0.0675216
PLAT	0.765166	-0.148816	-0.268539	-0.0523484	-0.340293
E2F6	0.250064	-0.0636168	-0.119656	-0.0379258	-0.133393
MDN1	0.300545	0.0178838	-0.0240496	0.0773399	-0.0217347
LOC100505650	0.447147	0.024706	-0.0689332	0.0811656	-0.0358796
ABCC1	0.235966	-0.0115278	-0.052872	0.0273872	-0.0370369
PDGFRL	0.585858	-0.0419905	-0.0597164	0.00962362	-0.1217
CA12	1.128	0.0305984	-0.040782	0.0653994	-0.12315
CA12	1.4064	0.0411613	-0.0468816	0.110247	-0.263066
ARNTL	0.77692	0.0261729	0.0286893	0.111196	-0.0965398
NRP1	0.333648	-0.091859	-0.0885211	-0.00525736	-0.161039
ARHGAP26	0.870759	0.176095	0.155452	0.29572	-0.00487655
LYN	0.377923	0.0168163	-0.0143371	0.00893276	-0.100879
BCL2L11	0.415825	-0.0112898	-0.0269599	0.0128201	-0.131033
ARL4C	0.221351	0.00442246	-0.0273838	0.00545477	-0.0714593
DGKI	0.435219	0.116178	0.070755	0.142517	-0.0139918
CBLN1	0.572223	-0.337302	-0.475968	-0.255229	-0.620449
TGIF2	0.450178	-0.160258	0.0309378	-0.0547175	-0.168434
DDX24	0.225927	0.04644	0.087078	0.081191	0.0511698
NOLC1	0.26312	0.0258921	0.0891846	0.0964465	0.030296
ABAT	0.301785	0.00727062	0.0966843	0.110566	0.0258143
RASGRP1	0.295489	-0.123864	-0.123812	-0.115443	-0.27929
BCL2L11	0.550601	0.10435	0.0920167	0.106078	-0.0911246
PRLR	0.421776	0.183597	0.199785	0.215165	0.0946257
MED13L	0.378049	-0.00224285	0.0479127	0.0337621	-0.0699706
AGT	0.641472	-0.083191	-0.0263296	-0.0619646	-0.174779
OLFM1	0.817645	-0.192115	-0.137483	-0.227297	-0.275751
CA12	0.952828	-0.0707954	-0.0596584	-0.109363	-0.147834
KDM4B	0.369675	-0.0546314	-0.0352485	-0.102143	-0.108382
GFRA2	0.810532	0.00612555	0.00110989	-0.0772152	-0.122843
FAM134B	0.303253	0.132992	0.131842	0.11202	0.0959159
ZNF3	0.267715	0.0334178	-0.0343548	0.0651908	-0.119558
C10orf2	0.243198	0.0551393	-0.00227403	0.0386371	-0.0986737
ULK1	0.296573	0.149014	0.0336278	0.118387	0.0269712
POP1	0.228089	0.0577011	-0.0898271	0.010099	-0.0999324
PPRC1	0.217243	0.0892992	-0.0296521	0.0505995	-0.0547775
MUC4	0.319035	0.110442	-0.100749	0.0600606	-0.0547562
SYNJ2	0.271905	0.112643	0.0261131	0.0986083	0.0256073
CHST10	0.340898	-0.0373356	-0.214733	-0.0533485	-0.202022
SCNN1B	0.382816	0.0149755	-0.123523	-0.0396226	-0.158999
KAZN	0.696987	-0.0392032	-0.214015	-0.140044	-0.356892
NT5DC3	0.265081	0.0430291	-0.0418708	0.0183848	-0.0892511
SLC7A6	0.230193	0.00940613	-0.0194219	0.0900904	-0.104925
POLR3E	0.169694	-9.57115e-05	0.0012984	0.0754398	-0.0230261
PDLIM4	0.357773	0.0367917	0.0311163	0.149219	0.000345816
PLCL2	0.447692	0.102357	0.106117	0.216294	0.0189786
AKAP1	0.276964	-0.0126442	-0.0827611	0.124344	-0.0741646
TLE3	0.240834	0.127888	-0.0375593	0.129768	0.0610377
RDX	0.196886	-0.3628	-0.261931	0.0220213	-0.063515
NEDD9	0.224608	-0.0161104	-0.0684622	0.0880945	0.0851742
GPR135	0.277161	0.0337765	0.0298001	0.12725	0.168971
PPP1R3D	0.422067	-0.0355777	0.124638	0.0828769	0.146011
NFAT5	0.400211	0.014587	0.0875993	0.0761505	0.212016
MYO10	0.358203	-0.00195281	-0.00384782	-0.11435	0.133991
EDAR	0.309738	0.0353651	-0.135743	-0.0622607	0.0900725
VNN1	0.390005	0.161069	0.233191	0.113886	-0.0322267
MAP3K9	0.258024	0.0820194	0.144038	0.0607034	-0.0696202
INHBA	0.5403	0.245121	0.29763	0.179161	-0.0897117
SLC25A36	0.207238	0.10334	0.0830801	0.0627483	-0.0746533
PPAT	0.221693	0.0700872	0.0595857	0.0509875	-0.0877792
PNN	0.224372	0.119891	0.107875	0.121201	0.0127948
PTHLH	0.368973	0.202153	0.234742	0.177466	0.115636
PTGS2	0.585561	0.0447425	0.185165	0.0926892	-0.162132
TGIF2	0.202258	-0.0364237	-0.0293324	-0.0516223	-0.116628
ARNTL	0.676174	0.157676	0.148073	0.0684113	-0.0815242
KIAA1199	0.405565	-0.0309429	-0.0744342	-0.0760553	-0.192232
CISH	0.621329	-0.290974	-0.375489	-0.449956	-0.60671
STC2	0.423525	0.0428373	-0.00936382	-0.130856	-0.253845
KCNF1	1.01432	0.15902	0.092442	-0.118214	-0.29776
IL12A	0.899093	0.00554728	0.0990413	-0.155748	-0.283718
SOX9	0.337018	0.0665677	-0.00968158	-0.0579819	-0.147297
C16orf45	0.384041	0.109231	0.0397081	-0.0171745	-0.0886128
PDLIM4	0.764615	0.311775	0.14303	0.113028	-0.0835704
MREG	0.272351	0.0641596	-0.0244555	-0.0104192	-0.0872248
LYN	0.360639	0.11347	0.0687919	0.0649542	-0.0487772
TFAP2C	0.303737	-0.1253	-0.219131	-0.198526	-0.241523
ST6GALNAC2	0.284984	-0.0656281	-0.155721	-0.122327	-0.167924
PLCG2	0.406924	0.0200162	-0.00986435	-0.049599	-0.037253
DHRS2	0.329483	0.0545361	-0.0751773	-0.0434695	-0.0848541
BDNF	0.307026	0.0850193	0.0159731	0.00714039	0.00391434
SHB	0.351209	0.165587	0.0285683	0.00123345	-0.0294163
MAP3K4	0.214244	0.0982222	0.0148432	-0.00226188	-0.00763297
IGF1R	0.424026	0.158056	-0.0237341	-0.016425	-0.066407
COBL	0.39671	0.170719	-0.0151351	-0.0155778	-0.0751652
KIAA0485	0.80326	0.295499	-0.0657511	-0.14924	-0.094369
PCNX	0.214167	0.143542	0.0507574	0.0561453	0.0203908
SLC7A5	0.383538	0.265333	0.106294	0.098662	-0.0253708
JARID2	0.623858	0.462762	0.311237	0.323028	0.0847954
SHB	0.342233	0.163143	0.102453	0.0273094	-0.0530577
EDN1	0.301534	0.144294	0.0861711	0.0123725	-0.0633529
RHOF	0.282437	0.169567	0.0929415	0.0611419	-0.00488259
OSBPL3	0.769755	0.442017	0.246676	0.174582	0.0528113
KIAA0226L	0.627053	0.428195	0.209984	-0.0381404	-0.15502
BMP2	0.545716	0.314642	0.0639141	-0.190327	-0.355849
BMP2	0.460649	0.198809	-0.0014768	-0.171879	-0.346276
INHBA	0.429	0.28825	0.165529	-0.0139445	-0.153084
DIRAS3	0.300425	0.17964	0.0988114	-0.0379288	-0.18504
KIAA0226L	0.514352	0.295642	0.218669	-0.00936443	-0.0747177
TXLNG	0.302184	0.172737	0.226784	0.00810099	0.0276592
BCL10	0.244352	0.110191	0.120079	-0.0382278	-0.0200563
TIPARP	0.262655	0.105605	0.11693	-0.0143375	-0.0337638
MYC	0.234595	-0.155347	-0.140521	-0.35805	-0.477374
LPIN1	0.273303	0.0870683	0.127464	-0.092365	-0.115921
KLF4	0.495921	0.160952	0.258222	-0.168814	-0.276862
KLF4	0.60387	0.229507	0.238297	-0.173619	-0.334964
SRRM2	0.269635	0.118005	0.107108	-0.0203621	0.0275812
SLC4A7	0.281058	0.153728	0.168399	0.0399304	0.145709
SOWAHC	0.217994	0.419804	0.337684	0.0433219	-0.119429
FOS	0.351418	0.609251	0.560976	-0.320572	-0.412483
EGR1	0.432845	0.850724	1.00057	-0.143835	-0.309478
DNMBP	0.261643	0.440107	0.261218	0.0700806	-0.0601152
ABTB2	0.255507	0.30569	0.209264	0.116077	0.0348968
BIRC3	0.411729	0.491015	0.410588	0.0176882	-0.168839
SF1	0.469937	0.605253	0.676595	0.411708	0.155343
EGR3	0.704314	0.729108	1.09525	0.113277	-0.0285778
SLC19A2	0.646657	0.544317	0.38982	-0.0960401	-0.304887
MAPKBP1	0.384745	0.322739	0.222852	-0.0138231	-0.20265
PPAP2B	0.418077	0.356271	0.325174	0.0465633	-0.108127
LPIN1	0.262698	0.152452	0.17476	-0.0462686	-0.147623
EXT1	0.396293	0.305371	0.397337	0.203563	0.116205
PPAP2B	0.404515	0.400215	0.206601	-0.0260079	-0.0789861
CENPJ	0.369479	0.135675	0.412504	0.29041	0.241316
ZIC1	-0.237607	-0.203244	-0.195412	-0.0982242	-0.060297
SMAD6	-0.285561	-0.23055	-0.253074	-0.0832677	0.00447629
FZD7	-0.405216	-0.245452	-0.25593	0.126182	0.144789
GAS1	-0.467949	-0.464394	-0.359739	0.0641652	0.142453
C1orf106	-0.220156	-0.200148	-0.228959	0.0959513	0.0870194
ADM	-0.217431	-0.192627	-0.204317	0.076287	0.0831144
BMP4	-0.278463	-0.234893	-0.279946	0.0882181	0.129842
FLVCR2	-0.249845	-0.297201	-0.274115	-0.0677685	-0.0115037
NR3C2	-0.272785	-0.3463	-0.413052	-0.102894	-0.050331
PRR15L	-0.251207	-0.607536	-0.552743	-0.145566	-0.129814
CCNG2	-0.2964	-0.565834	-0.35403	-0.187896	-0.125899
CYP1B1	-0.267601	-0.38766	-0.179141	-0.0895951	-0.116926
ZBED2	-0.323169	-0.054188	-0.120631	0.167352	0.134187
JAG1	-0.2757	0.00676282	-0.0687077	0.173231	0.228128
TOX	-0.459645	-0.243994	-0.221684	-0.0429958	0.0667664
FAM49A	-0.322576	-0.0835799	-0.154092	-0.0427039	0.00599779
TLE4	-0.417755	-0.27458	-0.0802144	-0.13785	-0.140766
LYST	-0.393573	-0.248324	-0.0317931	-0.112452	-0.128727
DDX25	-0.348113	-0.245175	-0.118087	-0.117823	-0.15993
PLAU	-0.366951	-0.0845485	0.0550591	0.117411	0.0846136
NAP1L3	-0.241246	-0.0971942	-0.0479609	0.0624897	-0.00797214
THEMIS2	-0.233744	-0.187579	-0.165217	-0.0681159	-0.0782474
STYK1	-0.220917	-0.0892191	-0.0844551	0.120367	0.0568781
THEMIS2	-0.283286	-0.265641	-0.165628	-0.0857182	-0.144019
CLEC7A	-0.235552	-0.209774	-0.121427	-0.11559	-0.0981425
CCNG2	-0.386638	-0.390605	-0.162836	-0.0903715	0.0488976
SLC39A2	-0.331953	-0.0952845	-0.31709	-0.175119	-0.11315
PDGFA	-0.26866	0.054987	-0.0314215	0.0529441	0.0838638
DIO2	-0.465384	0.228061	0.058246	0.123172	0.259232
EPHB3	-0.298584	0.0230892	-0.116662	-0.0200425	0.0224816
GTF2IRD1	-0.201886	0.00523956	-0.0726001	0.0195441	-0.00341032
LEF1	-0.428668	0.0556067	-0.159054	-0.0575379	-0.0615795
ADCY2	-0.294426	-0.0513205	-0.146927	-0.180136	-0.101256
TSC22D1	-0.298896	0.089918	0.135662	0.066681	0.0833628
ARID5B	-0.451101	0.17151	0.304928	0.0809853	0.148688
KLF9	-0.521436	-0.00812286	0.285631	0.0752097	0.0965535
FRMD4B	-0.357485	0.0771239	0.224324	0.158865	0.144064
TBX2	-0.259687	-0.125886	-0.072184	-0.118424	-0.14645
BCAR3	-0.305921	0.104972	0.132393	0.0859037	0.0143481
TNFRSF11B	-0.384925	-0.0606718	0.000231986	-0.00732603	0.0840536
TNFAIP8	-0.33872	0.0492309	0.0885691	0.107295	0.154821
TNFAIP8	-0.352983	0.0459939	0.125095	0.0825776	0.138638
PLAU	-0.311314	0.0549997	0.0672451	0.138294	0.104266
DLX2	-0.424007	0.0210993	0.0156245	0.138834	0.116043
EPHB3	-0.378702	-0.0994658	-0.10811	-0.0759929	-0.0635488
EFNB2	-0.280925	0.0839268	0.0281189	0.0795411	0.109132
KIR3DL3	-0.30797	-0.0905161	-0.0674587	-0.0948247	0.0360617
ACTG2	-0.240276	-0.134313	-0.087596	-0.158028	-0.0893367
TRIM24	-0.22534	0.0344359	0.0449819	-0.08669	-0.0871639
SPAG11B	-0.422519	-0.167166	-0.194777	-0.280755	-0.271374
SAMD4A	-0.200585	0.389094	0.308635	0.0867459	0.0773629
CYP26B1	-0.319513	0.208458	0.294018	0.0504567	0.0481153
ACRV1	-0.242559	0.0319643	0.0847074	-0.0699674	-0.0763215
CITED2	-0.268234	0.223613	0.260967	0.106527	0.0604263
NPTXR	-0.216825	0.043275	0.045659	-0.109237	-0.0147247
TP63	-0.311903	0.000801389	-0.0219505	-0.268805	-0.172738
KCNJ3	-0.18843	-0.0747099	-0.0135018	-0.0475915	-0.160216
